# Supplementary material
Source: PubMed Central journal article supplement (PMC2274938)

Supplementary Fig 1

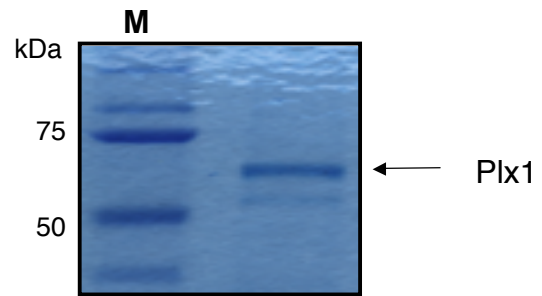

Supplementary Fig 2

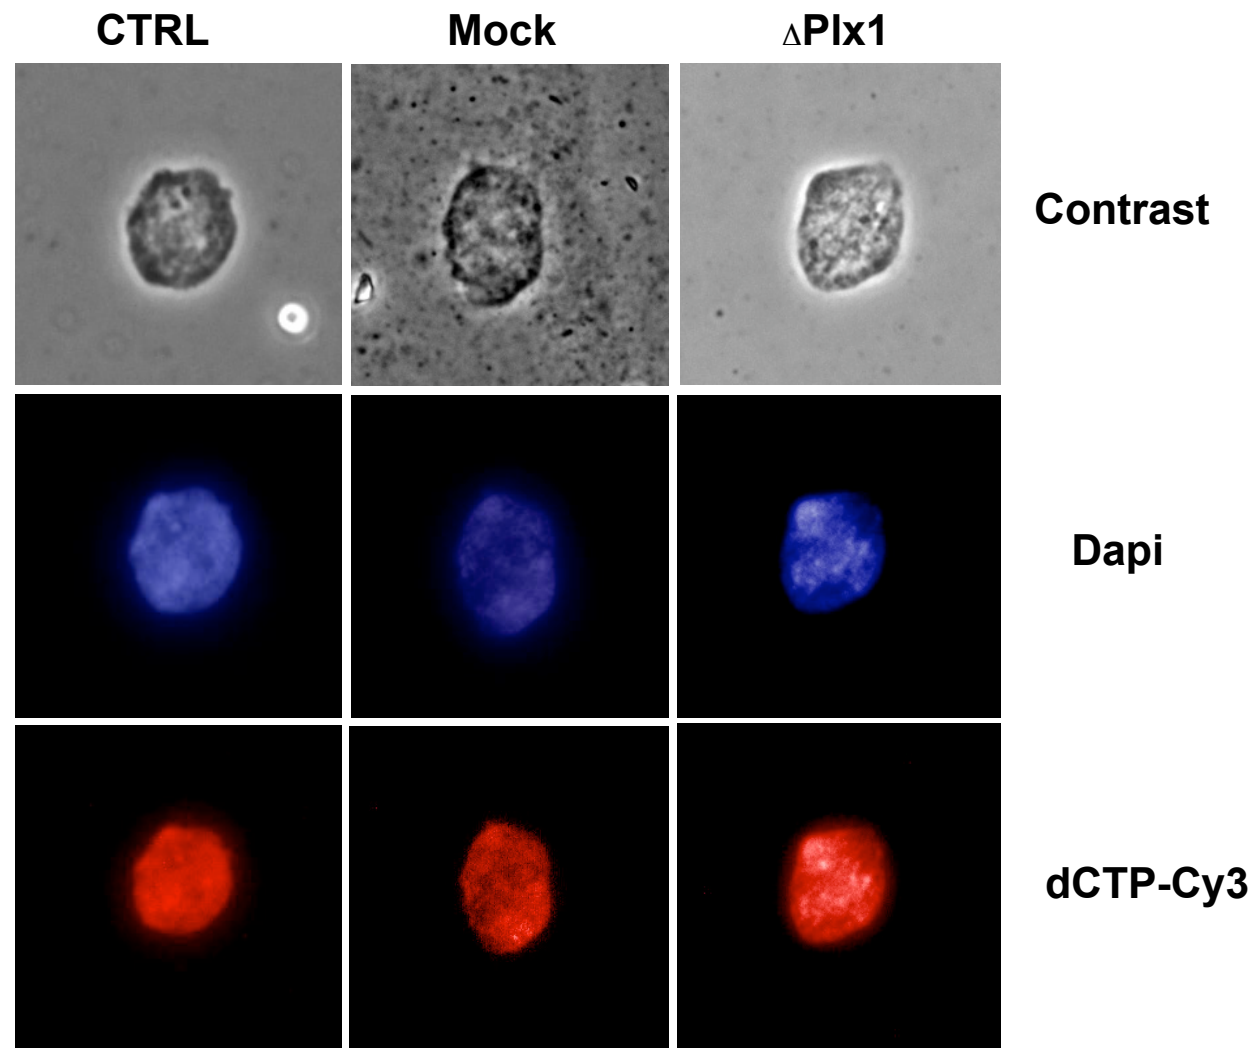

Supplementary Fig 3

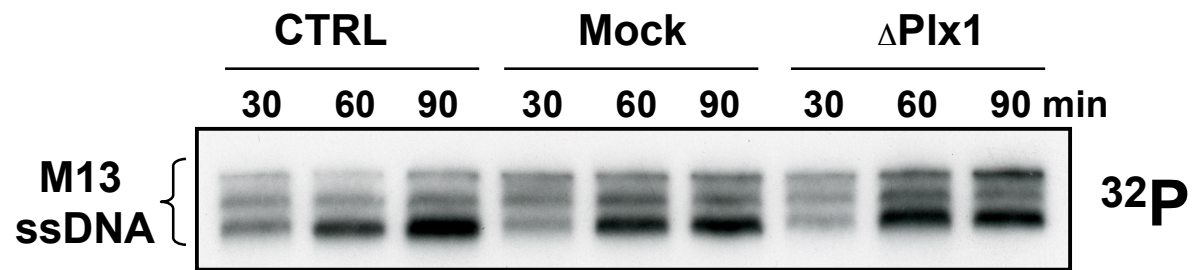

Supplementary Fig 4

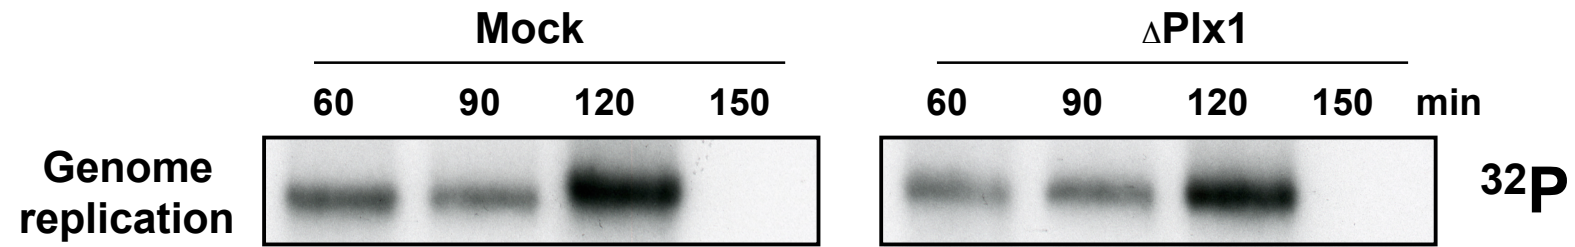

Supplementary Fig 5

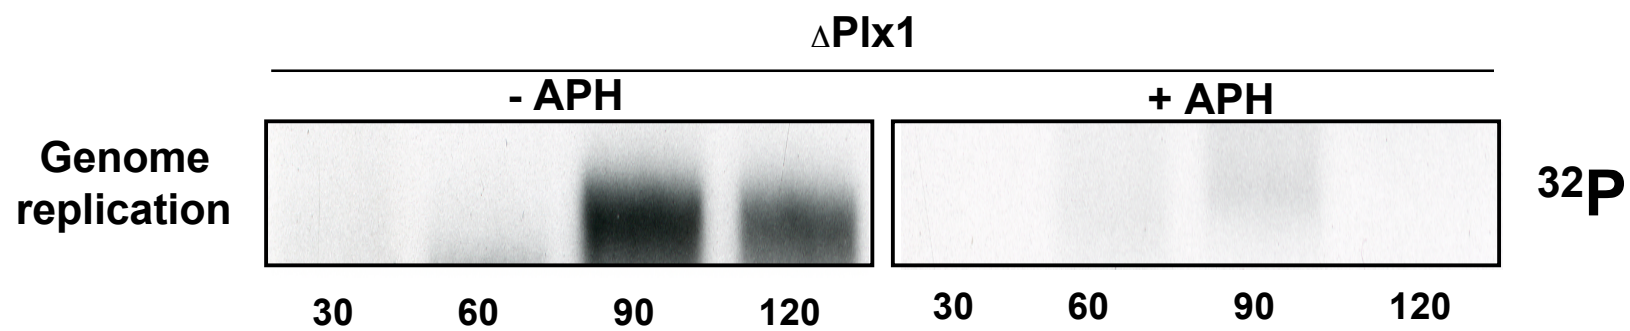

Supplementary Fig 6

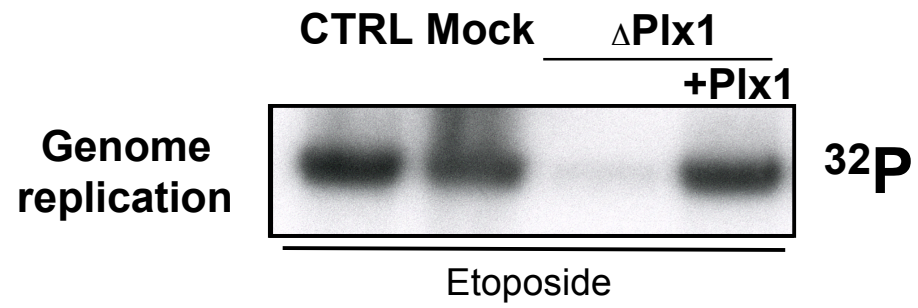

Supplementary Fig 7

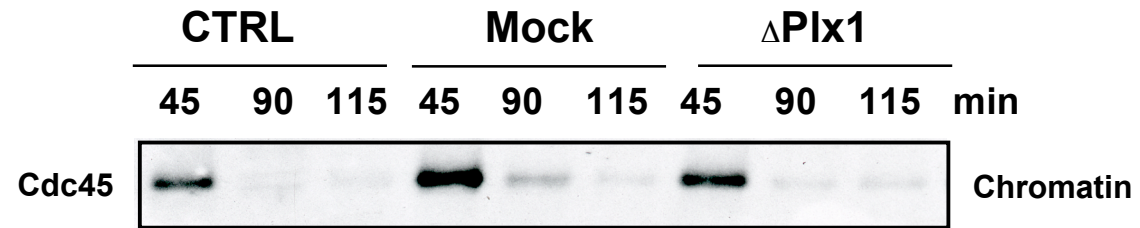

Supplementary Fig 8

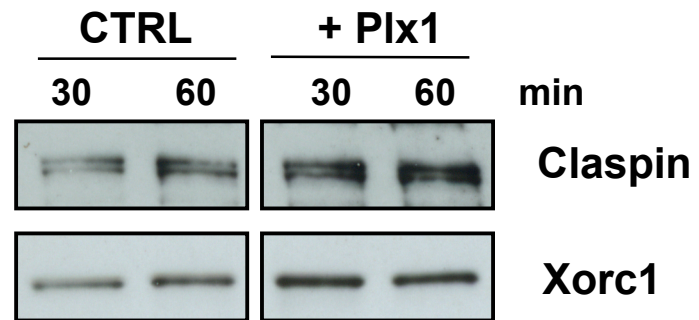



Supplementary Fig 9

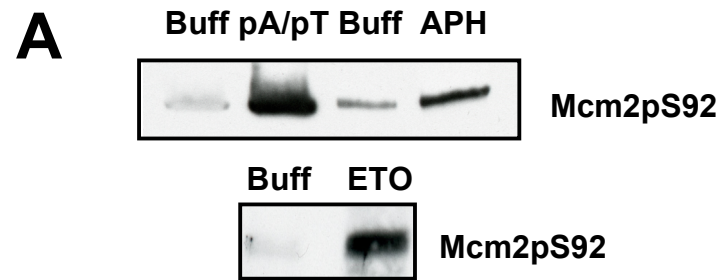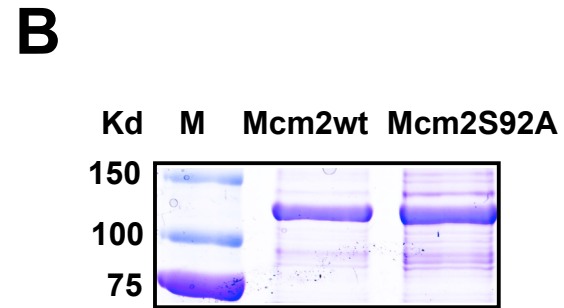

Supplement: emboj200829s1.pdf [file emboj200829s1.pdf]
